# Supplementary material for: BmCDK5 Affects Cell Proliferation and Cytoskeleton Morphology by Interacting with BmCNN in Bombyx mori
Source: MDPI journal article supplement (doi:10.3390/insects13070609), 2022-07-06
Supplement: s1 [file s1]

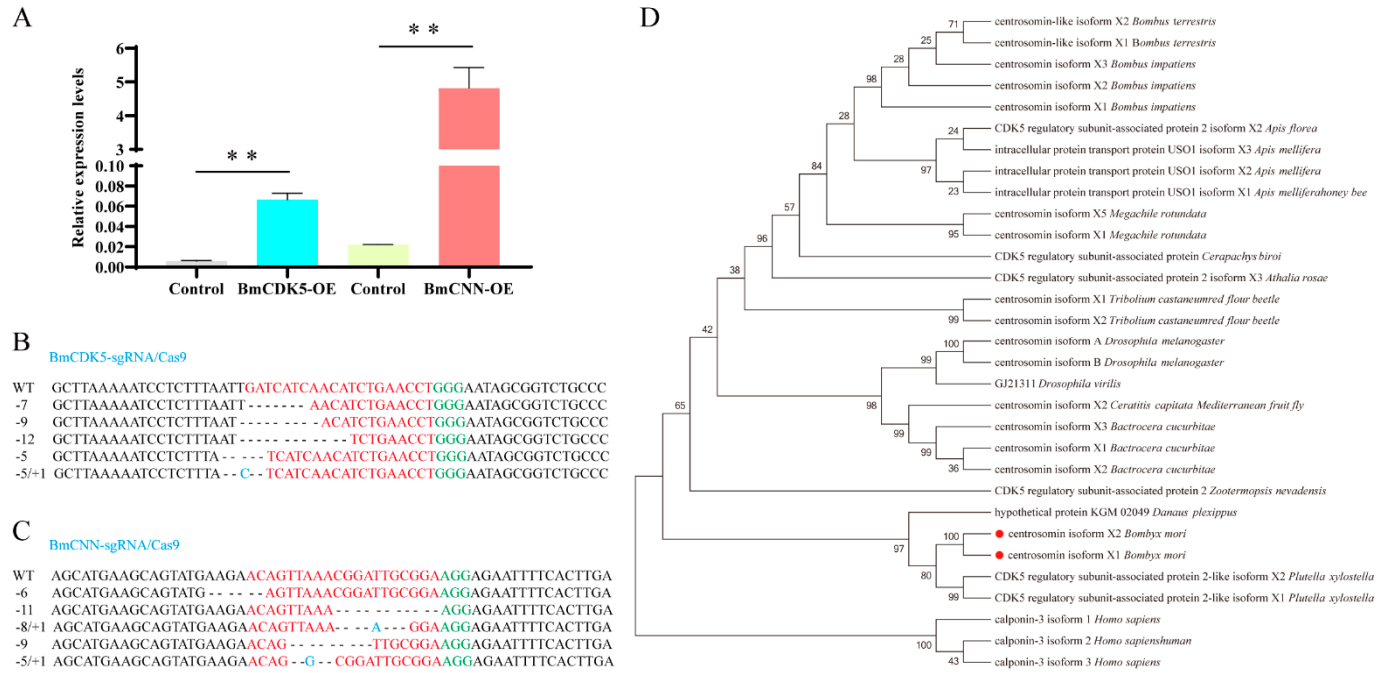

Figure. S1. (A) The level of transcription of *BmCDK5* and *BmCNN* in *BmCDK5* overexpressing BmNS cells and empty vector control cells was determined using qRT-PCR. The level of transcription of *BmCNN* in *BmCNN* overexpressing BmNS cells and empty vector control cells was determined using qRT-PCR (\*  $p < 0.05$ , \*\*  $p < 0.01$ ). (B-C) DNA sequencing analysis of the CRISPR/Cas9 editing target genes (*BmCDK5* and *BmCNN*). The red sequence is the target sequence. WT is the unknocked sample, as a reference. (D) Phylogenetic tree of CNN.

Table S1. The RT-qPCR primer sequences.

| Primers   | Sequences (5'-3')                                |
|-----------|--------------------------------------------------|
| QBmCDK5/F | GATGTATTGCACAGCGAAAAGA                           |
| QBmCDK5/R | CTTCAGCGGAATAGCACTTTAC                           |
| QBmCNN/F  | GCACAACGTTTCGATTACAAGTA                          |
| QBmCNN/R  | TTTCATCGAAGCGCTATTGTTC                           |
| BmCDK5/F  | CGCGGATCCATGGATTACAAGGATGACGACGATAAGATGCAAAAATAT |
| BmCDK5/R  | CCGGAATTCTTAACATCGATCATTCTTGACTG                 |

---

|            |                                                             |
|------------|-------------------------------------------------------------|
| BmCNN/F    | CCGGAATTCATGTACCCATACGATGTTCCAGATTACGCTATGGCCACATTACCTAGAAC |
| BmCNN/R    | CCGCTCGAGTTACATATTACTATGAGTTTCG                             |
| sgBmCDK5/F | AAGTGATCATCAACATCTGAACCT                                    |
| sgBmCDK5/R | AAACAGGTTTCAGATGTTGATGATC                                   |
| sgBmCNN/F  | AAGTACAGTTAAACGGATTGCGGA                                    |
| sgBmCNN/R  | AAACTCCGCAATCCGTTTAACTGT                                    |
| Qsw22934/F | AACACCCCGTCCTGCTCACTG                                       |
| Qsw22934/R | GGGCGAGACGTGTGATTTTCCT                                      |
| M13/F      | GTTTTCCCAGTCACGAC                                           |
| M13/R      | CAGGAAACAGCTATGAC                                           |
| U6/F       | GGAAGATCTTCCAGGTTATGTAGTACACATTGT                           |
| U6/R       | GGAAGATCTTCCAAAAAAGCACCGACTCG                               |
| T-BmCDK5/F | CGCGGATCCATGCAAAAATATGAG                                    |
| T-BmCDK5/R | GGAGATTTATTATGATGAACTCACC                                   |
| T-BmCNN/F  | TACTGGTGGTAGTACTTAGA                                        |
| T-BmCNN/R  | ATATCGATTTTATCAAGCAC                                        |

---
